# Supplementary material for: Expression and prognostic value of the transcription factors EGR1 and EGR3 in gliomas
Source: PubMed Central journal article supplement (PMC7283475; doi:10.1038/s41598-020-66236-x), 2020-06-09
Supplement: 41598_2020_66236_MOESM1_ESM.pdf [file 41598_2020_66236_MOESM1_ESM.pdf]

**Expression and prognostic value of the transcription factors EGR1 and EGR3 in gliomas**

Arnon Møldrup Knudsen, Ida Eilertsen, Susanne Kielland, Mikkel Warming Pedersen, Mia Dahl Sørensen, Rikke Hedegaard Dahlrot, Henning Bünsow Boldt, Sune Munthe, Frantz Rom Poulsen, Bjarne Winther Kristensen.

EGR1

EGR1 classified image

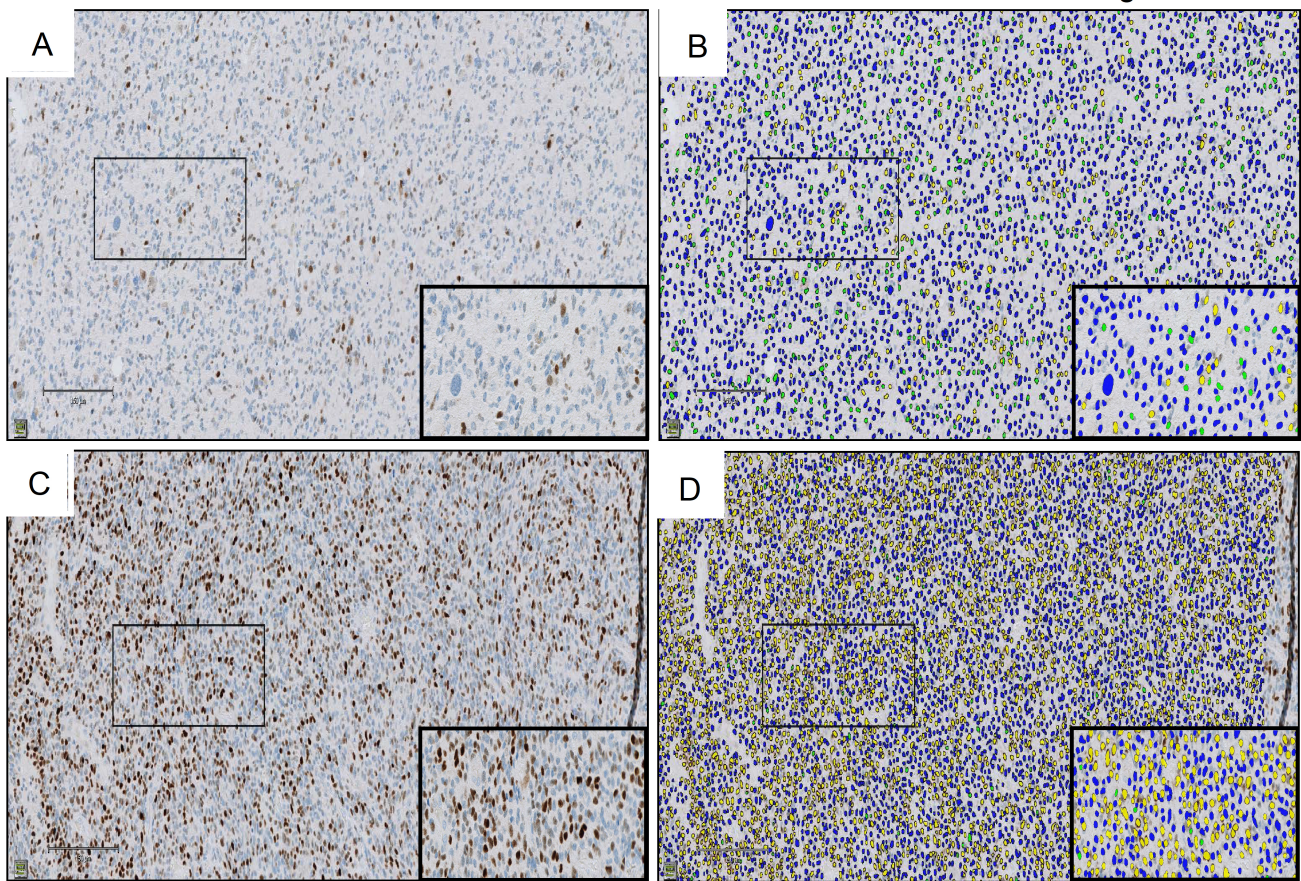

Colour code of nuclei in classified images:

EGR1 positive nuclei
  EGR1 negative nuclei
  Nuclei excluded from analysis

EGR3

EGR3

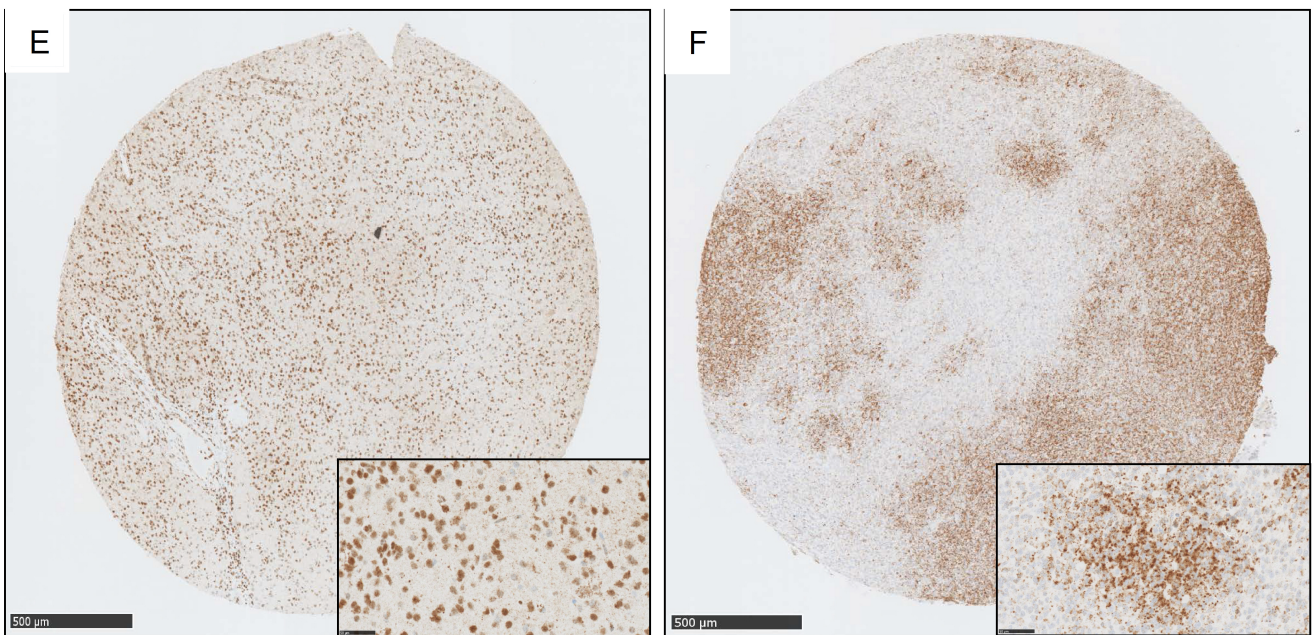

G

| Category                                                   | Score criterion            | Score | Core E | Core F |
|------------------------------------------------------------|----------------------------|-------|--------|--------|
| Fraction of positive nuclei (%)                            | 0% - <10% positive nuclei  | 0     | 3      | 1      |
|                                                            | 10% - <40% positive nuclei | 1     |        |        |
|                                                            | 40% - <70% positive nuclei | 2     |        |        |
|                                                            | ≥70% positive nuclei       | 3     |        |        |
| Mean staining intensity of positive nuclei                 | No staining                | 0     | 3      | 3      |
|                                                            | Weak staining              | 1     |        |        |
|                                                            | Moderate staining          | 2     |        |        |
|                                                            | Strong staining            | 3     |        |        |
| Fraction of cytoplasmic staining<br>(% of total core area) | 0% - <5% tumor area        | 0     | 0      | 3      |
|                                                            | 5% - <15% tumor area       | 1     |        |        |
|                                                            | 15% - <25% tumor area      | 2     |        |        |
|                                                            | ≥25% tumor area            | 3     |        |        |
| Total score                                                |                            | 0-9   | 6      | 7      |

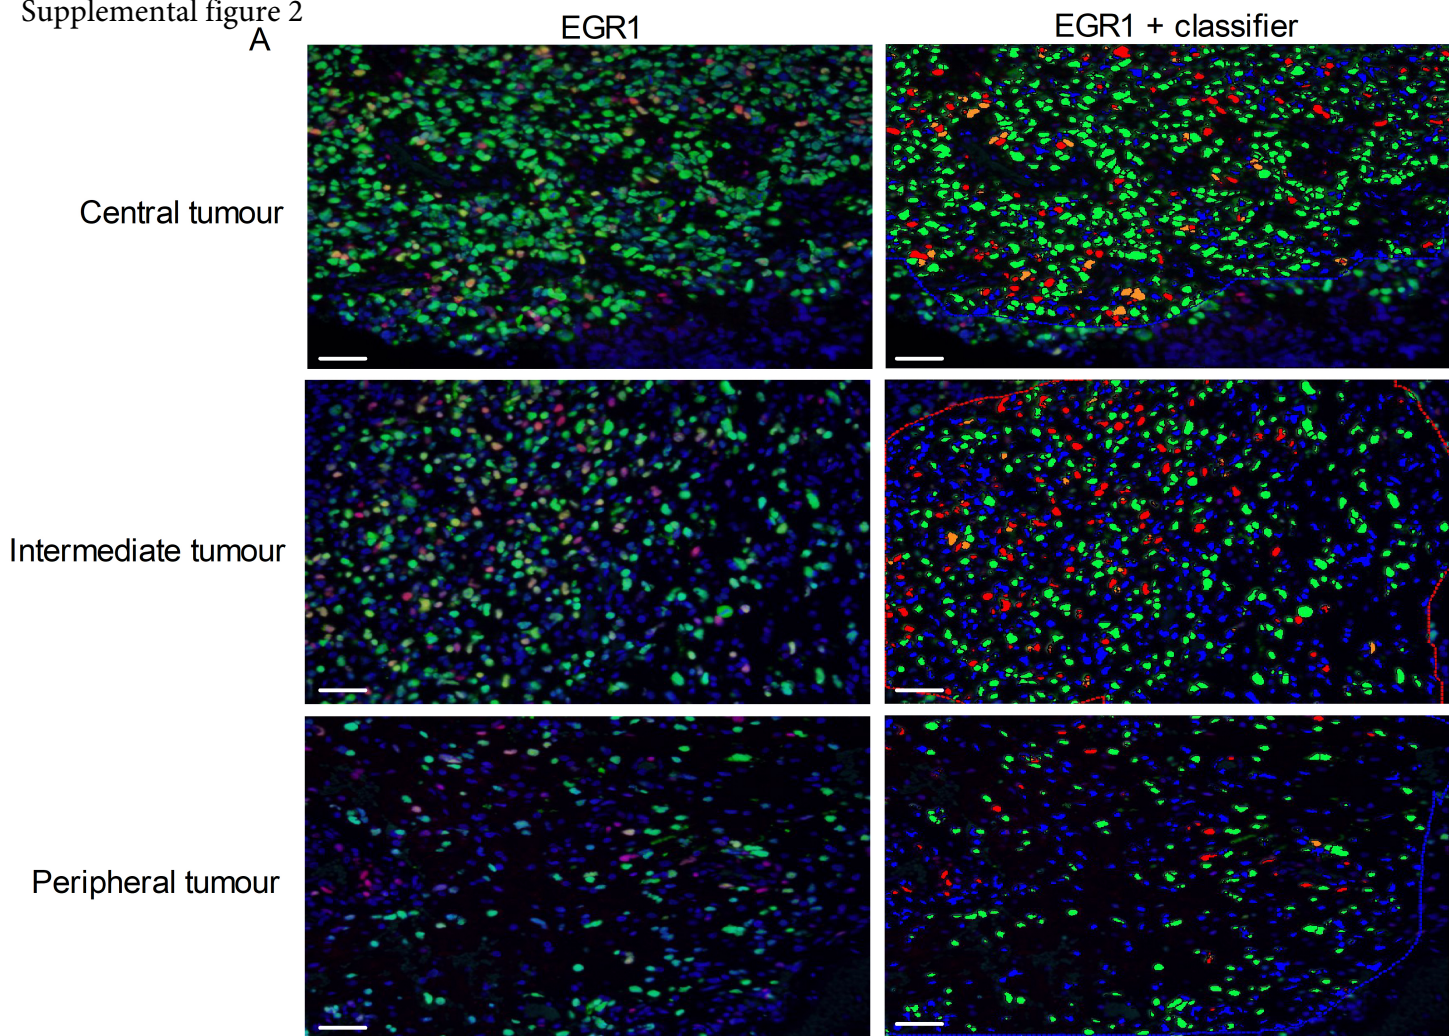

B

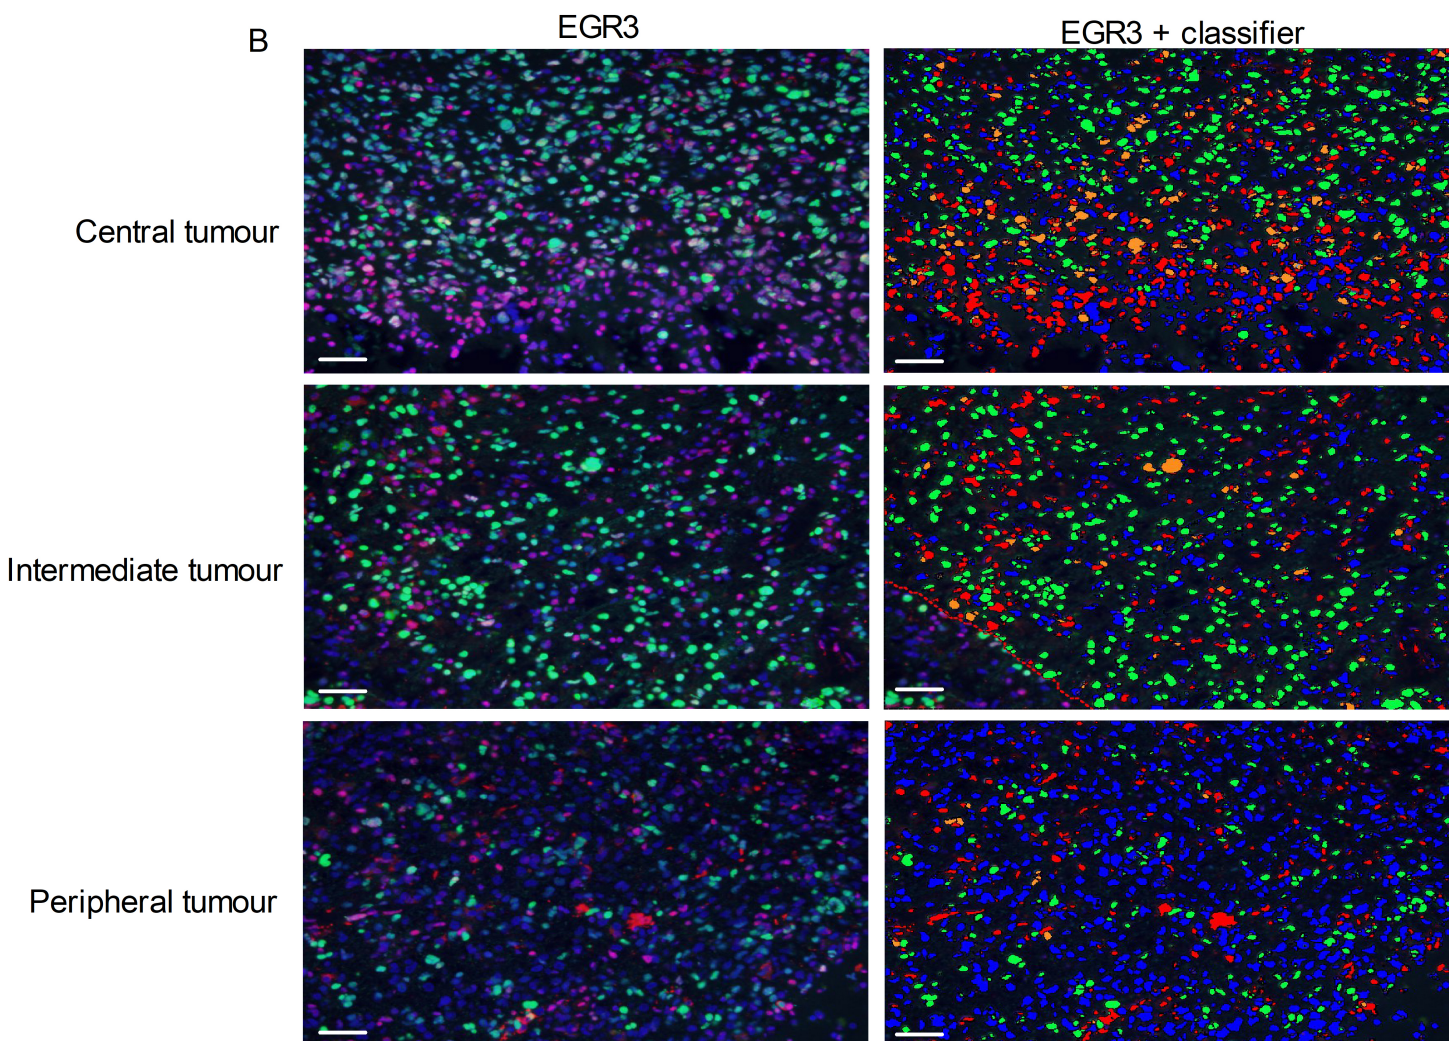

Colour code in classified images: DAPI P53+ EGR1/3+ P53+/EGR1/3+

# A Supplemental figure 3

Interaction between age and MGMT-methylation status.

| Variable                | No. of patients | HR (95% CI)      | P-value          |
|-------------------------|-----------------|------------------|------------------|
| Age                     | 190             | 1.02 (1.01-1.04) | <b>0.004</b>     |
| MGMT-methylation status |                 |                  |                  |
| Unmethylated            | 71              | 1.00             |                  |
| Methylated              | 94              | 0.54 (0.38-0.77) | <b>0.001</b>     |
| Age*MGMT Methylated     |                 | 1.04 (1.01-1.08) | <b>0.013</b>     |
| Post-surgical treatment |                 |                  |                  |
| No                      | 18              | 1.00             |                  |
| Yes                     | 172             | 0.57 (0.31-1.05) | 0.073            |
| Performance status      |                 |                  |                  |
| 0-1                     | 135             | 1.00             |                  |
| 2-4                     | 54              | 3.20 (2.12-4.85) | <b>&lt;0.001</b> |
| Gender                  |                 |                  |                  |
| Female                  | 82              | 1.00             |                  |
| Male                    | 108             | 0.81 (0.58-1.14) | 0.23             |

| Age (years)  | MGMT methylation status |            | Total      |
|--------------|-------------------------|------------|------------|
|              | Un-methylated           | Methylated |            |
| 0-40         | 3                       | 4          | 7          |
| 41-50        | 4                       | 8          | 12         |
| 51-60        | 14                      | 24         | 38         |
| 61-70        | 23                      | 28         | 51         |
| 71-80        | 23                      | 25         | 48         |
| 81+          | 4                       | 5          | 9          |
| <b>Total</b> | <b>71</b>               | <b>94</b>  | <b>165</b> |

**B** GBM - EGR3 nuclear fraction score

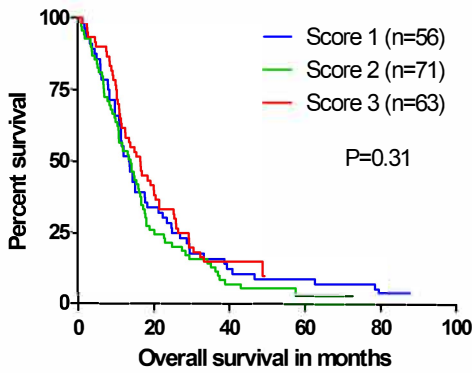

**C** GBM - EGR3 intensity score

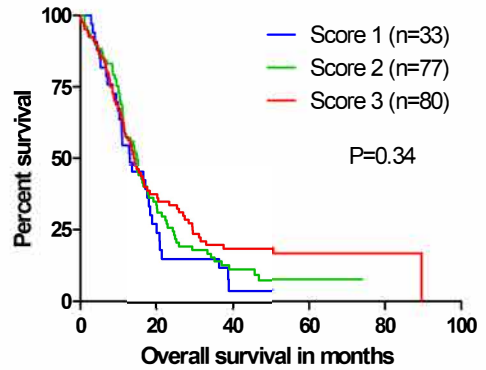

**D** GBM - EGR3 cytoplasmic score

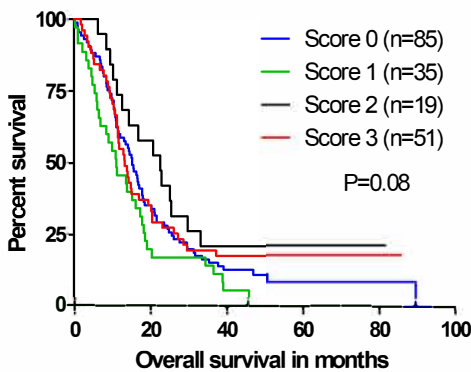

**E** GBM - EGR3 cytoplasmic staining

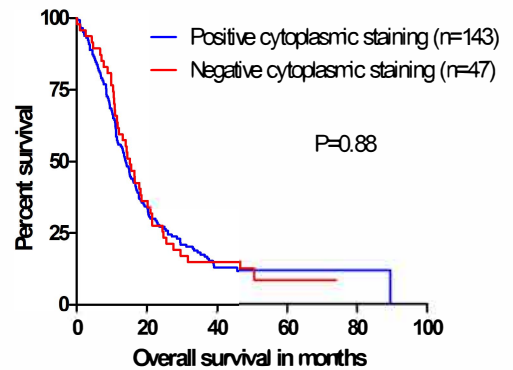

**F** GBM - EGR3 groups

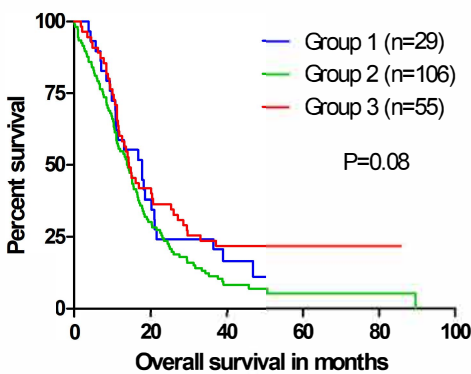

**G** GBM MGMT-unmethylated EGR1/EGR3 protein combinations

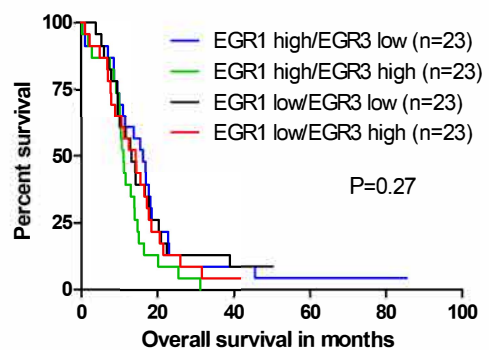

## Supplemental figure legends

**Supporting figure 1.** Digital classification of EGR1 immunostainings and semi-quantitative scoring system for EGR3 stainings. **A-B)** GBM with a low EGR1-positive fraction (10%). **C-D)** GBM with high cell density and closely adjacent EGR1-positive cells. **E)** Tumour core with a specific nuclear EGR3 staining pattern and a high fraction of EGR3 positive nuclei. **F)** Tumour core with diffuse areas of cytoplasmic staining, and low nuclear staining fraction. **G)** Schematic overview of scoring categories and criteria for the semi-quantitative scoring of EGR3 stainings. Scale bars in A-D=150  $\mu\text{m}$  and E-F=500  $\mu\text{m}$  with insets = 50  $\mu\text{m}$ . Magnification of images A-D=X10 with inset magnification=X40; E-F=X4 with insets =X40.

**Supporting figure 2.** Representative examples of the software-based cell classifier quantifying migrating tumour cells. A) EGR1 immunofluorescence stainings from the three different tumour regions depicted in the left column with the classifier applied on adjacent images in the right column. B) EGR3 immunofluorescence stainings shown as described above. Scale bar = 50  $\mu\text{m}$ .

**Supporting figure 3.** Cox-regression interaction term and non-significant Kaplan-Meier survival data.

**A)** While performing interaction tests for Cox-regressions, a significant interaction was found between patient age and MGMT-methylation status, with older patients being more likely to have a methylated MGMT-promoter. **B-D)** Division of GBM patients based on their EGR3 nuclear fraction scores, intensity scores or cytoplasmic scores did not show any differences in survival between the groups. **E)** Presence or absence of EGR3 cytoplasmic staining did not have any impact on patient survival. **F)** The survival of patients in assigned groups based on total points achieved in the EGR3 scoring system did not show any significant differences across the groups. **G)** Different EGR1 and EGR3 protein combinations in MGMT-promoter un-methylated GBMs did not differ significantly when investigating patient survival.
